# 1 **RG203KR mutations in SARS-CoV-2 Nucleocapsid: Assessing the impact using Virus-** 2 **like particle model system**

3 Harsha Raheja<sup>1</sup>, Soma Das<sup>2</sup>, Anindita Banerjee<sup>3</sup>, Dikshaya P<sup>1</sup>, Deepika C<sup>1</sup>, Debanjan  
4 Mukhopadhyay<sup>3</sup>, Subbaraya G Ramachandra<sup>4</sup>, Saumitra Das<sup>1,3,#</sup>

5 <sup>1</sup>Department of Microbiology and Cell Biology, Indian Institute of Science, Bangalore 560012, India

6 <sup>2</sup>Department of Biochemistry, Indian Institute of Science, Bangalore 560012, India

7 <sup>3</sup>National Institute of Biomedical Genomics, Kalyani 741251, India

8 <sup>4</sup>Central Animal Facility, Indian Institute of Science, Bangalore 560012, India

9 #Corresponding author: [sdas@iisc.ac.in](mailto:sdas@iisc.ac.in), [sdas@nibmg.ac.in](mailto:sdas@nibmg.ac.in)

## 10 **Abstract**

11 The emergence and evolution of SARS-CoV-2 is characterized by the occurrence of diverse  
12 sets of mutations that affect virus characteristics, including transmissibility and antigenicity.  
13 Recent studies have focused mostly on Spike protein mutations; however, SARS-CoV-2  
14 variants of interest (VoI) or concern (VoC) contain significant mutations in the nucleocapsid  
15 protein as well. To study the relevance of the mutations at the virion level, recombinant  
16 baculovirus expression system based VLPs were generated for the prototype Wuhan sequence  
17 along with Spike mutants like D614G, G1124V and the significant RG203KR mutation in  
18 Nucleocapsid. All the four structural proteins assembled in a particle wherein the morphology  
19 and size of the particle confirmed by TEM closely resembles the native virion. The VLP  
20 harbouring RG203KR mutations in nucleocapsid exhibited augmentation of humoral immune  
21 responses and enhanced neutralization by the immunized mice sera. Results demonstrate a non-  
22 infectious platform to quickly assess the implication of mutations in structural proteins of the  
23 emerging variant.

## 24 **Introduction**

25 COVID-19 has been one of the leading causes of death globally since its emergence in  
26 December 2019. The coronavirus, SARS-CoV-2, has been identified as the causative agent,  
27 and it has a 30 kb single stranded genome encoding 4 structural and 16 non-structural proteins  
28 (1). During infection, SARS-CoV-2 virus enters the cells through the ACE2 receptor (present  
29 on the epithelial cells lining the respiratory tract), which is recognized specifically by the spike  
30 protein SARS-CoV-2 virus (2). Along with the spike protein (S), Envelope (E) and Membrane  
31 (M) glycoprotein together form the virion structure which surround the genomic RNA coated  
32 by the Nucleocapsid (N) protein. Studies have shown that these structural proteins elicit host  
33 immune response thereby generating specific antibodies against them (3, 4). Nucleocapsid has  
34 been shown to be highly immunogenic and a promising vaccine target in SARS-CoV infection  
35 as well (5, 6). New virus variants with mutations in these proteins are emerging continuously,  
36 with increased transmissibility and severity. It is of utmost importance to understand the  
37 molecular basis and effects of these mutations for an effective therapeutic and vaccine  
38 development. However, it is challenging to study them because of Biosafety level 3(BSL-3)  
39 requirement. We have designed Virus-like particle (VLP), which is composed of all the  
40 structural proteins that form non-infectious virus-like particles but generate immune responses  
41 similar to infectious virus particles enabling the study of mutation of all the structural proteins  
42 in a more physiologically relevant system. The VLP has been produced using Baculovirus  
43 mediated gene expression because of its advantages over Adenovirus and lentivirus systems

44 (7, 8). The mutations, D614G and G1124V within spike and RG203KR within Nucleocapsid  
45 revealed plausible structural implications as depicted through previous studies (9, 10). D614G  
46 predominantly circulated worldwide and is presently incorporated into the backbone of all  
47 emerging strains (VoCs and VoIs). Clinical evidence has revealed to increase viral replication  
48 in the upper respiratory tract by augmenting infectivity and virion stability (11). G1124V is  
49 one of the major mutations on CD8 T cell epitopes in S protein, which might have significant  
50 implications in context to immunogenicity.

51 The R203K and G204R mutations in Nucleocapsid were first identified in the A2a lineage  
52 within China and subsequently have spread within other lineages across Western Europe, UK,  
53 and then to the US and other parts of the world through a number of VoCs and VoIs, viz., the  
54 Alpha, Gamma, Lambda and now in the most underscored VoC, the Omicron. This RG203KR  
55 mutation has been shown to enhance the infectivity, fitness and virulence (12-14). Recently, a  
56 different VLP approach has also been used to study the effect of Nucleocapsid mutations on  
57 transmissibility of the virus (15). However, the impact on immunogenicity remains to be  
58 studied. Here, we have incorporated these mutations to study their impact using VLP as a  
59 platform.

## 60 **Results and discussion**

61 **Expression, purification and characterisation of SARS-CoV-2 VLP.** We have expressed all  
62 the four structural proteins of SARS-CoV-2 in baculovirus expression system to form the VLP.  
63 These proteins were placed under separate promoters, cloned in the Baculovirus expression  
64 vector, BacPAK9 (Takara, USA) and transfected in Sf21 cells as described in the schematic  
65 (Fig. 1A), to yield recombinant baculovirus expressing SARS-CoV-2 structural proteins. Based  
66 on our earlier finding on the emerging mutations (9), we have generated three VLP constructs.  
67 First one contains sequences of the original Wuhan strain as prototype (WT-VLP). The second  
68 one harbours D614G and G1124V mutations in S protein (S mut-VLP). The third one harbours  
69 RG203KR mutation in N protein along with the previous S mutations (S+N mut-VLP). After  
70 Baculovirus titration, the expression of SARS-CoV-2 proteins through recombinant  
71 Baculovirus was confirmed 3-4 days post transduction of Sf21 cells by immunofluorescence  
72 (Fig 1B).

73 VLPs were purified by overlaying the cell lysate 96 h post transduction, over 30-45%(w/w)  
74 sucrose gradient followed by ultracentrifugation at 28000 rpm for 3 h. VLP -containing band  
75 was used for characterisation. Transmission Electron Microscopy (TEM), involving negative  
76 staining and immunogold labelling for S protein, revealed the particle diameter in range of 30-  
77 100 nm (Fig. 1C). VLP purity was assessed by silver staining of the samples run on SDS-PAGE  
78 (Fig. 1D). 4 prominent bands around expected size of S (150-180 kDa), E (12 kDa), M (26  
79 kDa) and N (48-49 kDa) proteins were observed, and further confirmed by Western Blotting  
80 using respective antibodies (Fig. 1E). Since anti-M and anti-E antibodies were not available  
81 commercially, sera obtained from mice injected with VLP was used to probe the blot.

82 To assess the physiological binding of VLPs to the ACE-2 receptor, Vero E6 cells were used.  
83 The VLP was fluorescence-labelled *in vitro* with Alexa Fluor 488 and its binding and  
84 internalisation was visualised by confocal microscopy (Fig. 1F). Concentration dependent  
85 increase of binding to Vero cells and absence of binding to ACE-2 deficient U937 cells  
86 confirmed the virus like, ACE-2 mediated, cell entry of VLPs.

87 **VLP induced immune response in mice.** To assess their immunogenicity, the purified VLPs  
88 were injected in mice and sera collected as mentioned (Fig. 2A). We first checked the VLP

89 tolerance by injecting a high dose (100 ug) in 6 weeks old Balb/c mice. We took 4 groups of  
90 mice, one for each VLP and one for vehicle control (PBS), with 6 mice in each group. The  
91 mice were monitored for 4 weeks for appearance of any toxic symptoms. All the mice survived  
92 with no effect on increase in body weight (Fig 2B). Additionally, administration of purified  
93 VLPs did not affect the histology of mice liver, kidney, heart and lungs as observed by  
94 histopathology (data not shown).

95 Humoral response generated against the WT-VLP was quantified using ELISA and all the three  
96 VLP injected sera exhibited significant response as compared to vehicle control. Grossly,  
97 immunization with S mut-VLP elicited a higher response after the booster dose in contrast to  
98 WT or even S+N mut-VLP. (Fig. 2C). Humoral immunity in the form of IgM (first class of  
99 antibodies) and IgG (antibody produced after class switching) response was measured against  
100 total S protein (Fig. 2D), receptor binding domain (RBD) of Spike (Fig. 2E) and Nucleocapsid  
101 (Fig. 2F). Immunization with VLPs elicited a strong IgM and IgG response against total spike  
102 protein. Similar IgM response was observed against RBD and Nucleocapsid as well. Highest  
103 levels of IgM against all the three antigens were observed when immunized with the S+N mut-  
104 VLP, especially after the administration of booster doses. Interestingly, IgG response against  
105 RBD after second booster was much higher for S-mut VLP as compared to the WT-VLP.  
106 Interestingly, additional incorporation of N mutation reduced this response. For IgG response  
107 against Nucleocapsid after second booster, again there was heightened response in mutant VLP  
108 injected sera, and the incorporation of additional N mutation further increased the response. It  
109 appears that RG203KR mutation in nucleocapsid increases the IgG response against N, while  
110 reducing it against RBD, which indicates that the mutation in Nucleocapsid can potentially  
111 alter the viral structure, which could alter the antigenic sites on other proteins such as Spike.  
112 To further assess the T-cell response against the injected VLPs, proliferation of T-cells in  
113 response to *in vitro* stimulation with peptides against the S protein was measured using MTT  
114 assay. Significant difference in proliferation of T-cells isolated from VLP injected mice spleen  
115 as compared to vehicle control establishes the specific activation and proliferation of T cells  
116 by the injected VLP (Fig. 2G). Amongst the VLPs, as with the humoral response, mutant VLPs  
117 showed higher T-cell proliferation as compared to WT-VLP.

118 The highest titre sera obtained upon immunization with VLPs was further used to check the  
119 neutralisation of labelled VLP binding to Vero cells. We observed more than 50% VLP  
120 neutralisation in the presence of 1:2 dilution of sera from mice immunized with all the 3 VLPs  
121 (Fig. 2H). Notably, the efficiency of neutralisation of S mut and S+N mut-VLP was higher than  
122 the WT-VLP, pointing towards the accessibility of RBD in these VLPs for antibody  
123 neutralisation, as observed previously.

124 Taken together, we provide a comprehensive report of the impact of RG203KR mutation in  
125 nucleocapsid, on the immunogenicity and neutralisation efficiency using a model which can be  
126 easily manipulated and exploited to study the emerging SARS-CoV-2 mutations in a system  
127 closely resembling the virus while being non-infectious. It can be used to study the immune  
128 evasion capability of emerging viral variants and the efficacy of administered vaccines against  
129 those mutants. The mutations in structural proteins can easily be incorporated in the VLP which  
130 can be used to check neutralisation efficacy of sera from vaccinated individuals.

## 131 **Materials and Methods**

### 132 **Cloning, transfection and generation of SARS-CoV-2 virus like particle (VLP):**

133 The structural genes S, E, M and N with respective promoters were synthesized commercially  
134 (GenScript, USA) and cloned in pBacPAK9 with restriction sites BamHI and EcoRI. Vector  
135 DNA pBacPAK9 containing the target gene was transfected into *Spodoptera frugiperda* cells,  
136 along with Bsu36 I-digested BacPAK6 Viral DNA as described earlier (Takara Bio Inc., USA)  
137 . Briefly,  $1 \times 10^6$  cells in 35-mm tissue culture incubated at 27°C for 1–2 hrs, washed with plain  
138 media and transfected with mixture containing DNA (100 ng/ $\mu$ l), Bsu36 I digested BacPAK6  
139 viral DNA and Bacfectin and kept at 27°C for 5 hrs. 2% TC100 (Sigma, USA) media was  
140 added and kept at 27°C. ~5 days after incubation, the medium, which contains viruses produced  
141 by the transfected cells, was collected and stored at 4°C. The titres of the generated baculovirus  
142 were determined using BacPAK Baculovirus rapid titre kit (Clontech, USA).

#### 143 **Immunofluorescence staining:**

144 For immunofluorescence staining of Sf21 cells infected with baculovirus expressing SARS-  
145 CoV-2 VLP, cells were seeded on coverslips in a 24-well plate for 14 h followed by infection  
146 with respective baculovirus. After the desired time of infection, cells were washed twice with  
147 1X PBS and fixed using 4 % formaldehyde at room temperature for 20 min. After  
148 permeabilization by 0.1 % Triton X-100 for 2 min at room temperature, cells were incubated  
149 with 3 % BSA at 37 °C for 1 h followed by incubation with the indicated antibody for 2 h at 4  
150 °C and then detected by Alexa-633-conjugated anti-mouse or Alexa-488 conjugated anti-rabbit  
151 secondary antibody for 30 min (Invitrogen). Images were taken using Zeiss microscope and  
152 image analysis was done using the Zeiss LSM or ZEN software tools.

#### 153 **Transmission Electron microscopy (Immunogold labelling and negative staining):**

154 The purified VLP was diluted in PBS, fixed with 4% paraformaldehyde and spotted onto 400  
155 mesh carbon-coated copper grids for 10 min. It was then blocked using 1% BSA for 10 min,  
156 which was followed by incubation with primary antibody against SARS-CoV-2 S protein (Cat.  
157 No.- 40592-R001) for 30 min. Thereafter, PBS wash was done 3- 5 times and the grid was  
158 incubated with gold conjugated anti-rabbit secondary antibody for 15 mins. After 7-8 PBS  
159 washes, 1% glutaraldehyde was added onto the grid for 5 min to stabilise the immunostaining.  
160 Again, PBS wash was done 5 times and the samples negatively stained using 2% Uranyl  
161 oxalate. After thorough PBS washes, the grids were air dried and examined under transmission  
162 electron microscope at 80kV to visualise the immunogold labelled VLPs.

#### 163 **Labelling of VLPs:**

164 SARS-CoV-2 LPs were labelled with Alexa fluor 488 carboxylic acid, succinimidyl ester (Cat.  
165 No.-A200000) using size exclusion chromatography columns. The labelled VLPs were used  
166 for binding with Vero cells in flow cytometry and imaging assays. For immunofluorescence  
167 imaging, Vero cells were seeded on coverslips in a 24 well plate. Labelled VLPs were added  
168 to the cells in DMEM media and incubated for 1-2 h at 37°C. Thereafter, coverslips were  
169 mounted on the slides and images taken in Zeiss710 confocal microscope and analyzed by Zen  
170 software tools.

#### 171 **Isolation of VLP:**

172 The Baculovirus infected Sf21 cells were lysed with TEN buffer [10 mM Tris (pH 7.5), 1.0  
173 mM EDTA, 1.0 M NaCl, 0.1% Triton X100, 1 mM PMSF]. For efficient lysis, the lysates  
174 underwent 2 freeze-thaw cycles in liquid Nitrogen followed by sonication at 3 sec on, 3 sec off  
175 for 2 minute cycle at 40 % efficiency setting. The lysates were centrifuged @3500 rpm for 30  
176 minutes at 4°C. After centrifugation, the supernatant was collected and added on top of 30%-

177 45% sucrose gradient and centrifuged @28000 rpm for 3 hours at 4°C in an ultracentrifuge  
178 using SW40 rotor. After centrifugation, the opaque band containing VLPs were collected and  
179 processed for characterisation.

### 180 **Western Blotting:**

181 Protein concentrations of the extracts were assayed by Bradford reagent (Bio-Rad) and equal  
182 amounts of cell extracts were separated by SDS-12 % PAGE and transferred onto a  
183 nitrocellulose membrane (Sigma). Samples were then analyzed by western blot using the  
184 desired antibodies, anti-SARS-CoV-2 S protein (Cat. No.- 40591-T62), anti-SARS-CoV-2 N  
185 protein (Cat. No.- 40143-MM05), Immunized mice sera followed by the respective secondary  
186 antibodies (horseradish peroxidase-conjugated anti-mouse or anti-rabbit IgG; Sigma).  
187 Antibody complexes were detected using the Immobilon™ Western systems (Millipore).

### 188 **Animal immunization:**

189 Approval for animal experiments was taken from 'Institutional Animal Ethics Committee'.  
190 Guidelines laid by the India National Law on animal care and use were followed for animal  
191 experiments. 24 female BALB/c mice, 6 weeks old, were grouped into four groups and  
192 immunization was given intra peritoneal (i.p.). SARS-CoV-2-LPs were conjugated with 2%  
193 alhydrogel as an adjuvant for immunization. In the first regimen, 30 µg of SARS-CoV-2-LPs  
194 was administered per mouse followed by two boosters with 15 µg SARS-CoV-2-LPs per mouse  
195 at an interval of 2 weeks between injection. In addition, mice group immunized with PBS  
196 served as a negative control. Pre-immune before the start of experiment and post-immune sera  
197 at each booster dose was isolated and stored at -70 °C. Mice were sacrificed and spleens  
198 removed at 10th day after final booster dose. Splenocytes were isolated as a mixed cell  
199 suspension using 70 µm cell strainer. ACK lysis buffer (155 mM NH<sub>4</sub>Cl, 10 mM KHCO<sub>3</sub>, and  
200 0.1 mM EDTA) was used to deplete red blood cells from the cell suspension.

### 201 **Toxicity study in mice:**

202 24 male BALB/c mice (6 weeks old) were grouped into four groups and 100µg of SARS-CoV-  
203 2-LPs conjugated with 2% alhydrogel was administered by i.p. The weight and behaviour of  
204 the animals were monitored for 28 days. After 28 days, the animals were sacrificed and liver,  
205 lungs, heart and kidneys were extracted. To examine the toxicity effect four weeks post SARS-  
206 CoV-2-LPs administration in both control and injected groups, the histological analysis of 10%  
207 NBF fixed mice tissues were performed commercially.

### 208 **Measurement of Humoral Immune response after VLP immunization**

209 ELISA was performed with murine sera collected after immunization with indicated VLPs at  
210 different time points. SARS-CoV-2 total spike proteins, receptor binding domains (RBD) and  
211 nucleocapsid (N) proteins were purchased from Sino Biologicals, China. ELISA was  
212 performed using Nunc MaxiSorp plates, Thermo Fisher Scientific, USA. Biotinylated goat anti  
213 mouse IgM, IgG, Streptavidin conjugated Horseradish peroxidase (Str-HRP), Bovine serum  
214 albumin (BSA) was purchased from Sigma Aldrich, USA. 3,3',5,5'-Tetramethylbenzidine  
215 (TMB) solution was purchased from Applied Biological materials (ABM), Canada. All the rest  
216 of the chemicals were purchased from Sisco Research Laboratories (SRL), India and are of  
217 molecular biology grade.

218 ELISA was performed as described elsewhere (16). Briefly, ELISA plates were coated with  
219 100 ng of proteins dissolved in PBS overnight. Next day, plates were washed with PBS with  
220 0.05% Tween 20 (wash buffer) for three times and subsequently blocked with PBS with 2%  
221 BSA and 0.05% Tween 20 (blocking buffer) for 2 hrs. Thereafter 100  $\mu$ l murine sera were  
222 added in 1 in 10000 dilution in blocking buffer for overnight. Following day, plates were  
223 washed thrice with wash buffer and 100  $\mu$ l biotinylated goat anti mouse IgM (1 in 10000) or  
224 IgG (1 in 25000) was added to the wells for 2 more hrs. After 2 hrs, plates were again washed  
225 thrice with wash buffer and 100  $\mu$ l streptavidin-HRP was added for 30 minutes. Finally, plates  
226 were washed five times with wash buffer and 100  $\mu$ l TMB substrate was added. Following 10  
227 minutes, 50  $\mu$ l stop solution (2N HCl) was added and absorbance was recorded using a  
228 microplate reader (Spectramax M2e, Molecular Device, USA) at 450 nm. Statistical analyses  
229 were performed using Graph Pad Prism version 8.0. A Two-Way ANOVA followed by  
230 Tukey's multiple comparison test was performed for determination of significance between  
231 groups and time points.

### 232 **Splenocyte proliferation assay**

233 In a 96-well plate,  $10^5$  splenocytes were seeded and stimulated with peptides against S protein  
234 (From GenScript) (2 $\mu$ g/ml) in addition to CD28 for 24h. ConcavalinA (ConA) was used as a  
235 positive control. Proliferation was measured using 3-(4,5-dimethylthiazol-2-yl)-2,5-  
236 diphenyltetrazolium bromide (MTT). MTT was added to the splenocytes at a final  
237 concentration of 0.5mg/ml after 24h of peptide stimulation. After 3-4 h, media was removed,  
238 cells treated with 100 $\mu$ l DMSO and the absorbance measured at 560 nm. The proliferation  
239 index was calculated by using the following formula:

240 Proliferation upon stimulation= [O.D (Stimulated)- O.D (Unstimulated)] / O.D (Unstimulated)

241 Proliferation index= Proliferation upon peptide stimulation / Proliferation upon ConA  
242 stimulation

### 243 **Inhibition of binding of labelled VLPs to Vero cells by immunized mice sera:**

244 The labelled VLPs were incubated with 1:2 and 1:4 dilutions of serum for 1 h at 37 °C.  
245 Vero cells ( $5 \times 10^5$ ) were added to the mixture of SARS-CoV-2-VLPs and antibody in DMEM  
246 and 25 mM of HEPES buffer (100  $\mu$ l) and incubated for 2 h at room temperature. Unbound  
247 complexes were removed by washes. Cell-bound fluorescence was analysed using an FACS  
248 Verse flow cytometer (Becton Dickinson) using BDFACSuite software to calculate the cell  
249 population bound by VLPs and percent binding was determined from the equation:

250 % Binding of VLP to cells = [percentage of VLP bound cells in experimental sample –negative  
251 control (only cells)] / [ percentage of VLP bound cells in positive control (no sera) –negative  
252 control (only cells)]  $\times 100$ .

### 253 **Acknowledgements**

254 This work was supported by the Department of Biotechnology (DBT),  
255 (BT/PR40824/COV/140/3/2020); DBT-IISc Partnership Program; Department of Science and  
256 Technology, (DST-FIST).

257 S.D acknowledges J.C. Bose Fellowship from DST. H.R is supported by Council of Scientific  
258 and Industrial Research, India (SPMF). So.D is supported by WoSA, DST. A.B is supported  
259 by NPDP, DST.

## 260 **Figure legends**

261 **Fig 1. SARS-CoV-2 VLP purification and characterisation** (A) Schematic for the VLP  
262 expression construct and the baculovirus generation methodology. ph: Baculoviral-Polyhedrin  
263 promoter, p10: Baculoviral-p10 promoter, S: SARS-CoV-2 Spike protein, E: SARS-CoV-2  
264 Envelope protein, M: SARS-CoV-2 Membrane protein, N: SARS-CoV-2 Nucleocapsid  
265 protein. (B) Baculovirus infected Sf21 cells were harvested after 96 h and processed for  
266 confocal staining using anti-S and anti-N specific primary antibodies and AF488 and AF633  
267 labelled secondary antibodies. Nucleus was counterstained using DAPI. The bar represents  
268 10um. (C) Transmission Electron Microscope images on purified VLP. The purified VLP was  
269 fixed and added to the copper grid, stained for S-protein using specific primary and  
270 immunogold labelled secondary antibody. Negative staining was done using uranyl oxalate.  
271 The arrow indicates immunogold labelled S protein. The purified VLPs were loaded onto SDS-  
272 10% polyacrylamide gel, followed by (D) silver staining (Adjacent to the VLP lane, a lower  
273 fraction of the gradient was loaded, confirming the VLP purity) and (E) western blotting to  
274 detect the presence of S-protein and N-protein using specific primary antibodies and HRP-  
275 tagged secondary antibodies. VLP injected mice sera was used as primary antibody followed  
276 by HRP-tagged anti-mouse antibody as secondary antibody. (F) Vero cells were incubated with  
277 AF488 labelled VLPs for 2h and processed for confocal imaging. The bar represents 20um.

278  
279 **Fig 2. Immune response against SARS-CoV-2 VLP injection in mice.** (A) Schematic of  
280 immunogenicity studies in mice. (B) Body weight of mice was measured at the indicated time  
281 points after VLP injection. ELISA was performed with murine sera collected after  
282 immunization with indicated VLPs at different time points. (C) WT-VLP, (D) Full length Spike  
283 protein (E) RBD of Spike protein (F) Nucleocapsid protein were used as antigen. Mice sera  
284 were added to the coated antigens and either HRP-tagged IgG+IgM (for panel C) or biotin  
285 labelled IgG/IgM antibodies (panels D, E and F) were used as secondary antibodies. Colour  
286 development by Streptavidin-HRP followed by addition of TMB substrate was quantified and  
287 plotted after normalisation as described previously. Two-way ANOVA was done for statistical  
288 analysis.  $p < 0.05 = *$ ,  $p < 0.01 = **$ ,  $p < 0.001 = ***$  (G) Splenocyte proliferation in response to  
289 peptides against Spike protein was quantified using MTT assay. MTT was added after 24 h of  
290 peptide stimulation and the colour development was quantified and plotted. Student's t-test was  
291 done for statistical analysis.  $p < 0.05 = *$ ,  $p < 0.01 = **$ ,  $p < 0.001 = ***$  (H) Neutralisation of VLP  
292 binding to cells. Labelled VLP were incubated with indicated dilutions of sera prior to binding  
293 with Vero cells. VLP binding to cells after pre-incubation was analysed by flow cytometry and  
294 quantified.

## 295 **References**

- 296 1. Su S, *et al.* (2016) Epidemiology, Genetic Recombination, and Pathogenesis of  
297 Coronaviruses. *Trends in Microbiology* 24(6):490-502.
- 298 2. Beyerstedt S, Casaro EB, & Rangel EB (2021) COVID-19: angiotensin-converting enzyme 2  
299 (ACE2) expression and tissue susceptibility to SARS-CoV-2 infection. *European Journal of*  
300 *Clinical Microbiology & Infectious Diseases* 40(5):905-919.
- 301 3. Ravichandran S, *et al.* (2020) Antibody signature induced by SARS-CoV-2 spike protein  
302 immunogens in rabbits. 12(550):eabc3539.
- 303 4. Amrun SN, *et al.* (2020) Linear B-cell epitopes in the spike and nucleocapsid proteins as  
304 markers of SARS-CoV-2 exposure and disease severity. *EBioMedicine* 58:102911.

- 305 5. Leung DT, *et al.* (2004) Antibody response of patients with severe acute respiratory syndrome  
306 (SARS) targets the viral nucleocapsid. *The Journal of infectious diseases* 190(2):379-386.
- 307 6. Kim TW, *et al.* (2004) Generation and Characterization of DNA Vaccines Targeting the  
308 Nucleocapsid Protein of Severe Acute Respiratory Syndrome Coronavirus. 78(9):4638-4645.
- 309 7. Felberbaum RS (2015) The baculovirus expression vector system: A commercial  
310 manufacturing platform for viral vaccines and gene therapy vectors. 10(5):702-714.
- 311 8. Liu F, Wu X, Li L, Liu Z, & Wang Z (2013) Use of baculovirus expression system for  
312 generation of virus-like particles: Successes and challenges. *Protein Expression and*  
313 *Purification* 90(2):104-116.
- 314 9. Maitra A, *et al.* (2020) Mutations in SARS-CoV-2 viral RNA identified in Eastern India:  
315 Possible implications for the ongoing outbreak in India and impact on viral structure and host  
316 susceptibility. *Journal of Biosciences* 45(1):76.
- 317 10. Guo E & Guo H (2020) CD8 T cell epitope generation toward the continually mutating  
318 SARS-CoV-2 spike protein in genetically diverse human population: Implications for disease  
319 control and prevention. *PLOS ONE* 15(12):e0239566.
- 320 11. Plante JA, *et al.* (2021) Spike mutation D614G alters SARS-CoV-2 fitness. *Nature*  
321 592(7852):116-121.
- 322 12. Wu H, *et al.* (2021) Nucleocapsid mutations R203K/G204R increase the infectivity, fitness,  
323 and virulence of SARS-CoV-2. *Cell Host & Microbe* 29(12):1788-1801.e1786.
- 324 13. Ye Q, West AMV, Silletti S, & Corbett KD (2020) Architecture and self-assembly of the  
325 SARS-CoV-2 nucleocapsid protein. *Protein science : a publication of the Protein Society*  
326 29(9):1890-1901.
- 327 14. Hisham Y, Ashhab Y, Hwang S-H, & Kim D-E (2021) Identification of Highly Conserved  
328 SARS-CoV-2 Antigenic Epitopes with Wide Coverage Using Reverse Vaccinology  
329 Approach. 13(5):787.
- 330 15. Syed Abdullah M, *et al.* (Rapid assessment of SARS-CoV-2 evolved variants using virus-like  
331 particles. *Science* 0(0):eabl6184.
- 332 16. Mukhopadhyay D, *et al.* (2012) Evaluation of serological markers to monitor the disease  
333 status of Indian post kala-azar dermal leishmaniasis. *Transactions of the Royal Society of*  
334 *Tropical Medicine and Hygiene* 106(11):668-676.

335



**Figure 1.**

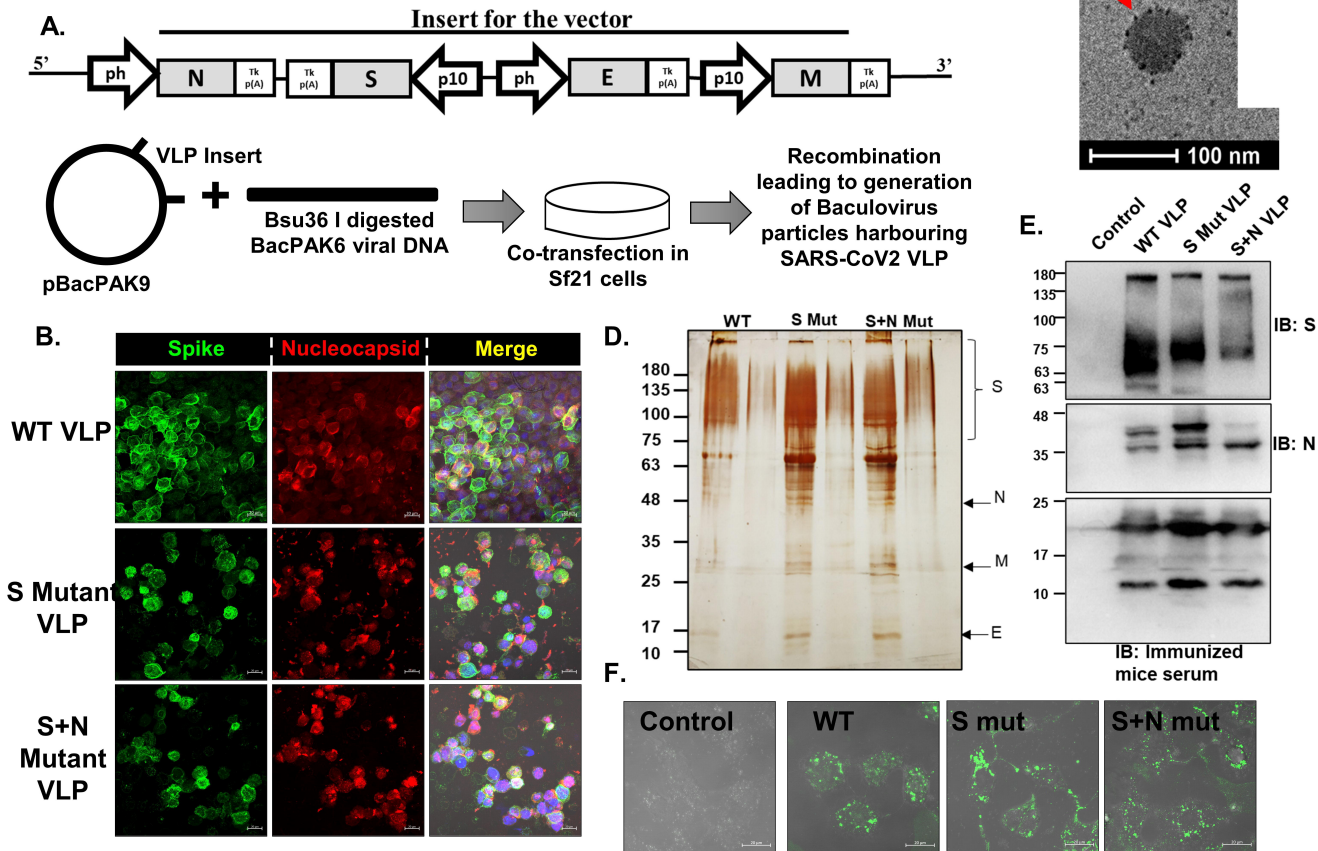

**Figure 2.**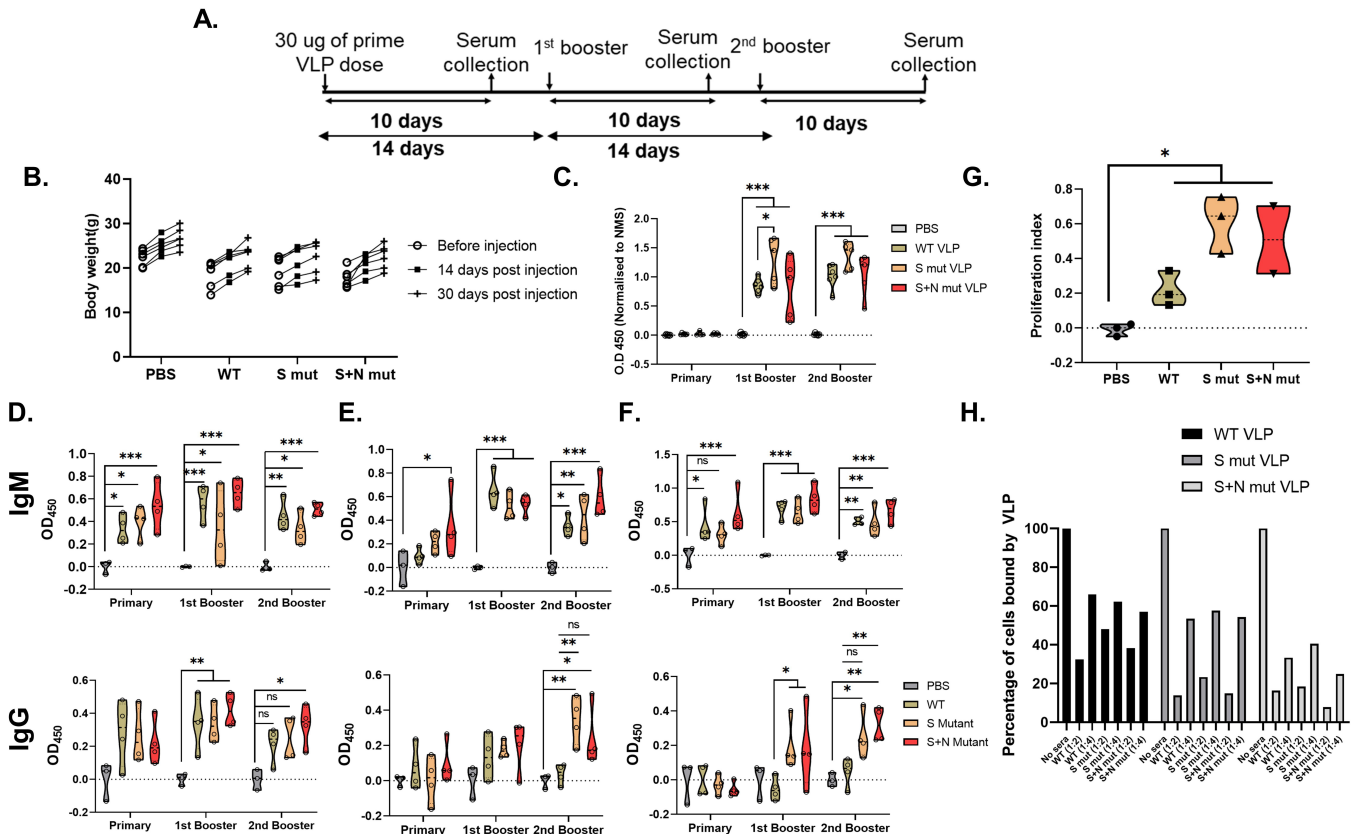

Source: https://www.biorxiv.org/content/10.1101/2022.01.02.473343v1.full.pdf
